# Editor's Note

The ASME JOURNAL OF ELECTRONIC PACKAGING is the leading quarterly journal in the field of the application of mechanical, materials, reliability, heat transfer, and manufacturing engineering to the "high-technology" area. The journal deals with various theoretical (analytical and computer-aided) and experimental problems and results related to the application of methods and approaches of engineering and applied mechanics to the analysis, design, manufacturing, testing, and operation of electronic, optoelectronic, and photonic components, devices, and systems. The primary objective of the journal is to disseminate technical information of permanent interest to practical engineers and researchers in the field through publication of technical papers. It should be emphasized that we complement rather than compete with other "high-technology" journals. Moreover, we often collaborate with the editorial boards of various electrical, optical, and materials research journals. We are an international journal. Our technical editors, as well as our authors, are from a variety of countries (e.g., Japan, several European countries, Taiwan, and Singapore).

Originality, practicality, high engineering level, and of course, mechanical orientation are the major criteria for the acceptance of a submitted paper. When substantial advances are made in one of the existing areas of "high-technology" engineering, or when a new area has been developed to a definite stage, special invited review articles are considered by the editorial board. We also welcome submissions which contain any other information that is of interest to the readers of the journal (e.g., comments on recently published papers; book reviews; information about new important patents and discoveries in the field; announcements for conferences and exhibitions; calls for papers; various information about the major past, current, and future events in the "high-technology" field and in mechanical engineering, as related to this field; etc.).

The authors are encouraged to have their papers organized, whenever possible, in the following "standardized" order: paper title; author(s) name(s) and affiliation(s); mailing, facsimile, and e-mailing addresses of the first author; ASME membership and grade for all the authors; abstract (not exceeding 100 words); introduction; main body of the paper; numerical data and/or numerical examples (for analytical treatments); discussion (where appropriate); acknowledgments (if applicable); references; appendices (where applicable). This, in the editors' opinion, makes the articles easier to read. The authors are also encouraged to make their work as practical and palatable as possible, without sacrificing the level and mechanical orientation of the journal. We realize that the specifics of the field of the electronic, optoelectronic, and photonic engineering and packaging is such that many potential readers of our journal do not have mechanical or applied math backgrounds and proceed from the concept that if the reader does not understand the writer, it is always the writer's fault, not the reader's. Therefore, we suggest the following to our authors: put formal mathematical derivations into the appendices (which can be made as extended as necessary); give detailed explanations, with the emphasis on the applications; consider a discussion section, where appropriate; clearly explain the major findings of the work; thoroughly formulate the conclusions and practical recommendations; etc. At the same time, we require that, as a rule, the article should be sufficiently brief (approximately 6 printed pages in a journal).

We are proud to state that our journal is both technically and commercially successful. Those who would like to contribute papers or information, submit a noncommercial advertisement or announcement, participate in the work of the editorial board, or express an opinion of the journal can do so by contacting the technical editor at the following address: E. Suhir, Bell Laboratories, 600 Mountain Ave., Room 1D-443, Murray Hill, NJ 07974; phone: 908-582-5301, fax: (908) 582-5106, e-mail: suhir@lucent.com

**Dr. E. Suhir, Editor**
